# Supplementary material for: The side population of ovarian cancer cells defines a heterogeneous compartment exhibiting stem cell characteristics
Source: PubMed Central journal article supplement (PMC4196181; doi:10.18632/oncotarget.2053), 2014-06-01
Supplement: oncotarget-05-7027-s001.pdf [file oncotarget-05-7027-s001.pdf]

**Supplemental Table 1: Characteristics of human ovarian cancer cell lines used in this study.**

| <b>Cell Line</b>  | <b>Description</b>                                                                             | <b>Supposed Histological Subtype</b> | <b>p53 Status</b> | <b>References</b> |
|-------------------|------------------------------------------------------------------------------------------------|--------------------------------------|-------------------|-------------------|
| A2780             | Derived from tumor tissue of an untreated patient                                              | Endometrioid                         | wild-type         | [1-4]             |
| A2780V            | Variant cell line of A2780                                                                     | Same as A2780                        | unknown           | [5]               |
| B2/92             | Derived from primary tumor tissue of an untreated patient                                      | Poorly differentiated                | unknown           | [6]               |
| B16/92            | Derived from omental metastasis of an untreated patient                                        | Poorly differentiated                | unknown           | [6]               |
| B17/92            | Derived from malignant ascites of an untreated patient                                         | Serous                               | unknown           | [6]               |
| B74/93            | Derived from pleural effusion of an untreated patient                                          | Serous                               | unknown           | [6]               |
| Caov-3 (HTB-75)   |                                                                                                | High-grade serous                    | mutated           | [1, 2, 7-9]       |
| HOC-7             | Well-differentiated stage III adenocarcinoma of the ovary, derived from ascites tumor          | Low-grade serous                     | wild-type         | [10-12]           |
| IGROV1            | Stage III ovarian cancer, derived from right ovary                                             | Mixed/endometrioid                   | wild-type         | [1, 13, 14]       |
| MDAH-2774         | Derived from malignant ascites                                                                 | Endometrioid                         | mutated           | [7, 9, 15-17]     |
| OVCAR-3 (HTB-161) | Derived from tumor tissue of a patient refractory to cisplatin, derived from malignant ascites | High-grade serous                    | mutated           | [1, 2, 4, 7, 18]  |
| SKOV-3 (HTB-77)   | Derived from malignant ascites                                                                 | Atypical non-serous                  | mutated           | [1, 8, 9, 19, 20] |
| SKOV-6            |                                                                                                | unknown                              | unknown           | [21]              |

Note: There may be contradictory reports regarding the p53 status of particular cell lines. For instance, IGROV1 and SKOV-3 were also recently reported as mutant and wild-type for p53, respectively [2].

**Supplemental Table 2: Screening of various ovarian cancer cell lines for commonly used CSC markers.**

|              | <b>A2780</b> | <b>A2780V</b> | <b>B2/92</b> | <b>B16/92</b> | <b>B17/92</b> | <b>IGROV1</b> |
|--------------|--------------|---------------|--------------|---------------|---------------|---------------|
| <b>CD24</b>  | 2.22 ± 0.18  | 0.51 ± 0.14   | 98.7 ± 0.50  | 10.59 ± 0.38  | 2.29 ± 0.12   | 99.8 ± 0.15   |
| <b>CD44</b>  | —            | —             | 3.92 ± 0.34  | 0.31 ± 0.01   | —             | 24.5 ± 1.32   |
| <b>CD90</b>  | 99.6 ± 0.40  | 99.6 ± 0.35   | —            | 7.11 ± 0.88   | 0.51 ± 0.26   | 0.29 ± 0.07   |
| <b>CD133</b> | 0.30 ± 0.04  | —             | 6.76 ± 1.06  | 0.44 ± 0.08   | —             | 4.80 ± 0.67   |
| <b>CD326</b> | 0.51 ± 0.14  | —             | 98.75 ± 0.55 | 0.32 ± 0.04   | —             | 98.43 ± 1.17  |
| <b>ALDH</b>  | 0.63 ± 0.06  | 0.08 ± 0.01   | 18.63 ± 0.85 | 4.10 ± 1.08   | 0.25 ± 0.09   | 1.21 ± 0.17   |
| <b>SP</b>    | 0.62 ± 0.14  | 11.03 ± 0.86  | 0.77 ± 0.19  | 0.31 ± 0.09   | 0.08 ± 0.02   | 0.76 ± 0.25   |

**Supplemental Table 3: List of antibodies used in this study.**

| <b>Test Antibody</b> | <b>Alternate Names</b>               | <b>Clone</b> | <b>Format</b>        | <b>Supplier</b>                                        |
|----------------------|--------------------------------------|--------------|----------------------|--------------------------------------------------------|
| CD24                 | BA-1, HSA                            | 32D12, ML5   | PE, PerCP/Cy5.5, APC | Miltenyi Biotec, BioLegend                             |
| CD44                 | H-CAM, Pgp-1                         | DB105        | FITC                 | Miltenyi Biotec                                        |
| CD49d                | VLA-4 $\alpha$ , Integrin $\alpha$ 4 | 9F10         | PE, APC-eFluor-780   | BD Pharmingen <sup>TM</sup> , eBioscience              |
| CD80                 | B7-1, CD28LG1                        | L307.4       | PE                   | BD Pharmingen <sup>TM</sup>                            |
| CD86                 | B7-2, CD28LG2                        | 2331 (FUN-1) | PE                   | BD Pharmingen <sup>TM</sup>                            |
| CD90                 | Thy-1                                | 5E10         | APC                  | BioLegend                                              |
| CD95                 | Fas, Apo-1                           | DX2          | PE-Cy7, APC          | eBioscience, BD Biosciences                            |
| CD106                | VCAM-1                               | STA          | PE                   | BioLegend                                              |
| CD133                | Prominin-1                           | 293C3        | APC                  | Miltenyi Biotec                                        |
| CD140a               | PDGFR $\alpha$                       | $\alpha$ R1  | PE                   | BD Pharmingen <sup>TM</sup>                            |
| CD171                | L1CAM                                | 11a-9.3      | Alexa Fluor 647      | Prof. Dr. Peter Altevogt                               |
| CD178                | FasL, CD95L                          | ALF-2.1A     | FITC                 | Biomol                                                 |
| CD183                | CXCR3                                | 1C6/CXCR3    | PE                   | BD Pharmingen <sup>TM</sup>                            |
| CD184                | CXCR4, Fusin                         | 12G5         | PE, PE-CF594         | BD Pharmingen <sup>TM</sup> , BD Horizon <sup>TM</sup> |
| CD193                | CCR3                                 | 5E8          | Alexa Fluor 647      | BD Pharmingen <sup>TM</sup>                            |
| CD195                | CCR5                                 | 3A9          | PE                   | BD Pharmingen <sup>TM</sup>                            |
| CD196                | CCR6                                 | 11A9         | PE                   | BD Pharmingen <sup>TM</sup>                            |
| CD199                | CCR9                                 | 112509       | Alexa Fluor 647      | BD Pharmingen <sup>TM</sup>                            |
| CD200                | OX-2                                 | OX-108       | PE                   | BioLegend                                              |
| CD243                | P-glycoprotein, ABCB1, MDR1          | UIC2         | PE, APC              | eBioscience                                            |

|                         |                        |                |                  |                                                  |
|-------------------------|------------------------|----------------|------------------|--------------------------------------------------|
| CD317                   | BST2, Tetherin         | 26F8           | Alexa Fluor 488  | eBioscience                                      |
| CD324                   | E-cadherin             | 67A4           | FITC             | BioLegend                                        |
| CD325                   | N-cadherin             | 8C11           | PE               | BioLegend                                        |
| CD326                   | EpCAM, ESA             | HEA-125        | FITC, PE-Cy7     | Miltenyi Biotec,<br>BioLegend                    |
| CD338                   | ABCG2, Bcrp1           | 5D3            | APC, Biotin      | BioLegend                                        |
| HLA-ABC                 | MHC class I            | G46-2.6        | FITC             | BD Pharmingen™                                   |
| Streptavidin            |                        |                | BV421            | BioLegend                                        |
| <b>Control Antibody</b> | <b>Alternate Names</b> | <b>Clone</b>   | <b>Format</b>    | <b>Supplier</b>                                  |
| CD4                     | T4, Leu-3a             | SK3            | FITC, PE, APC    | BD Biosciences                                   |
| CD21                    | C3DR, CR2              | B-ly4          | FITC             | IQ Products                                      |
| CD40                    | TNFRSF5                | 5C3            | FITC             | eBioscience                                      |
| CD45                    | LCA, T200              | TU116, MB4-6D6 | PE, APC, APC-Cy7 | BD Pharmingen™,<br>Miltenyi Biotec,<br>BioLegend |
| CD45RA                  |                        | 14.8           | PE               | BD Pharmingen™                                   |
| CD62L                   | L-selectin             | SK11           | FITC             | BD Biosciences                                   |

**Supplemental Table 4. Multicolor staining protocols.**

| Staining 1 | Staining 2 | Staining 3 | Staining 4 | Staining 5 | Staining 6 |
|------------|------------|------------|------------|------------|------------|
| CD24       | CD24       | CD24       | CD24       | CD24       | CD24       |
| CD49d      | CD49d      | CD49d      | CD44       | CD44       | CD44       |
| CD90       | CD95       | CD95       | CD49d      | CD49d      | CD49d      |
| CD95       | CD171      | CD133      | CD95       | CD95       | CD90       |
| CD140a     | CD184      | CD184      | CD140a     | CD133      | CD95       |
| CD184      | CD325      | CD325      | CD171      | CD140a     | CD184      |
| HLA-ABC    | HLA-ABC    | HLA-ABC    | CD184      | CD184      | CD325      |
| SP         | SP         | SP         | SP         | SP         | SP         |

SP.....SP/NSP discrimination

*Modifications:*

IGROV1 – Staining 2: CD326 instead of HLA-ABC

IGROV1 – Staining 5: CD326 instead of CD44

## References

1. Anglesio MS, Wiegand KC, Melnyk N, Chow C, Salamanca C, Prentice LM, Senz J, Yang W, Spillman MA, Cochrane DR, Shumansky K, Shah SP, Kalloger SE and Huntsman DG. Type-specific cell line models for type-specific ovarian cancer research. PloS one. 2013; 8(9):e72162.
2. Domcke S, Sinha R, Levine DA, Sander C and Schultz N. Evaluating cell lines as tumour models by comparison of genomic profiles. Nature communications. 2013; 4:2126.
3. Eva A, Robbins KC, Andersen PR, Srinivasan A, Tronick SR, Reddy EP, Ellmore NW, Galen AT, Lautenberger JA, Papas TS, Westin EH, Wong-Staal F, Gallo RC and Aaronson SA. Cellular genes analogous to retroviral onc genes are transcribed in human tumour cells. Nature. 1982; 295(5845):116-119.

4. Godwin AK, Meister A, O'Dwyer PJ, Huang CS, Hamilton TC and Anderson ME. High resistance to cisplatin in human ovarian cancer cell lines is associated with marked increase of glutathione synthesis. *Proc Natl Acad Sci U S A*. 1992; 89(7):3070-3074.
5. Zeimet AG, Reimer D, Sopper S, Boesch M, Martowicz A, Roessler J, Wiedemair AM, Rumpold H, Untergasser G, Concin N, Hofstetter G, Muller-Holzner E, Fiegl H, Marth C, Wolf D, Pesta M, et al. Ovarian cancer stem cells. *Neoplasma*. 2012; 59(6):747-755.
6. Marth C, Zeimet AG, Herold M, Brumm C, Windbichler G, Muller-Holzner E, Offner F, Feichtinger H, Zwierzina H and Daxenbichler G. Different effects of interferons, interleukin-1beta and tumor necrosis factor-alpha in normal (OSE) and malignant human ovarian epithelial cells. *International journal of cancer Journal international du cancer*. 1996; 67(6):826-830.
7. Kannan K, Coarfa C, Rajapakshe K, Hawkins SM, Matzuk MM, Milosavljevic A and Yen L. CDKN2D-WDFY2 Is a Cancer-Specific Fusion Gene Recurrent in High-Grade Serous Ovarian Carcinoma. *PLoS genetics*. 2014; 10(3):e1004216.
8. Fan S, Twu NF, Wang JA, Yuan RQ, Andres J, Goldberg ID and Rosen EM. Down-regulation of BRCA1 and BRCA2 in human ovarian cancer cells exposed to adriamycin and ultraviolet radiation. *International journal of cancer Journal international du cancer*. 1998; 77(4):600-609.
9. Lin J, Tang H, Jin X, Jia G and Hsieh JT. p53 regulates Stat3 phosphorylation and DNA binding activity in human prostate cancer cells expressing constitutively active Stat3. *Oncogene*. 2002; 21(19):3082-3088.
10. Buick RN, Pullano R and Trent JM. Comparative properties of five human ovarian adenocarcinoma cell lines. *Cancer Res*. 1985; 45(8):3668-3676.
11. King ER, Zu Z, Tsang YT, Deavers MT, Malpica A, Mok SC, Gershenson DM and Wong KK. The insulin-like growth factor 1 pathway is a potential therapeutic target for low-grade serous ovarian carcinoma. *Gynecologic oncology*. 2011; 123(1):13-18.
12. Mullany LK, Liu Z, King ER, Wong KK and Richards JS. Wild-type tumor repressor protein 53 (Trp53) promotes ovarian cancer cell survival. *Endocrinology*. 2012; 153(4):1638-1648.
13. Benard J, Da Silva J, De Blois MC, Boyer P, Duvillard P, Chiric E and Riou G. Characterization of a human ovarian adenocarcinoma line, IGROV1, in tissue culture and in nude mice. *Cancer Res*. 1985; 45(10):4970-4979.
14. O'Connor PM, Jackman J, Bae I, Myers TG, Fan S, Mutoh M, Scudiero DA, Monks A, Sausville EA, Weinstein JN, Friend S, Fornace AJ, Jr. and Kohn KW. Characterization of the p53 tumor suppressor pathway in cell lines of the National Cancer Institute anticancer drug screen and correlations with the growth-inhibitory potency of 123 anticancer agents. *Cancer Res*. 1997; 57(19):4285-4300.
15. Freedman RS, Pihl E, Kusyk C, Gallager HS and Rutledge F. Characterization of an ovarian carcinoma cell line. *Cancer*. 1978; 42(5):2352-2359.
16. Wang Y, Wu R, Cho KR, Shedden KA, Barder TJ and Lubman DM. Classification of cancer cell lines using an automated two-dimensional liquid mapping method with hierarchical clustering techniques. *Molecular & cellular proteomics : MCP*. 2006; 5(1):43-52.
17. Jacobberger JW, Sramkoski RM, Zhang D, Zumstein LA, Doerksen LD, Merritt JA, Wright SA and Shults KE. Bivariate analysis of the p53 pathway to evaluate Ad-p53 gene therapy efficacy. *Cytometry*. 1999; 38(5):201-213.
18. Hamilton TC, Young RC, McKoy WM, Grotzinger KR, Green JA, Chu EW, Whang-Peng J, Rogan AM, Green WR and Ozols RF. Characterization of a human ovarian carcinoma cell line (NIH:OVCAR-3) with androgen and estrogen receptors. *Cancer Res*. 1983; 43(11):5379-5389.

19. Pisanu ME, Ricci A, Paris L, Surrentino E, Liliac L, Bagnoli M, Canevari S, Mezzanzanica D, Podo F, Iorio E and Canese R. Monitoring response to cytostatic cisplatin in a HER2(+) ovary cancer model by MRI and in vitro and in vivo MR spectroscopy. *Br J Cancer*. 2014; 110(3):625-635.
20. Yaginuma Y and Westphal H. Abnormal structure and expression of the p53 gene in human ovarian carcinoma cell lines. *Cancer Res*. 1992; 52(15):4196-4199.
21. Wallen JW, Cate RL, Kiefer DM, Riemen MW, Martinez D, Hoffman RM, Donahoe PK, Von Hoff DD, Pepinsky B and Oliff A. Minimal antiproliferative effect of recombinant mullerian inhibiting substance on gynecological tumor cell lines and tumor explants. *Cancer Res*. 1989; 49(8):2005-2011.
